# Supplementary material for: Walking test outcomes in adults with genetic neuromuscular diseases: a systematic literature review of their measurement properties
Source: PubMed Central journal article supplement — Eur J Phys Rehabil Med. 2024 Feb 1;60(2):257–69. doi: 10.23736/S1973-9087.24.08095-X (PMC11114158; doi:10.23736/s1973-9087.24.08095-x), 2024-02-01
Supplement: Supplementary_Digital_Material1.pdf [file Supplementary_Digital_Material1.pdf]

## SUPPLEMENTARY DIGITAL MATERIAL 1

### The search formulation of this COSMIN review

1) ("gait"[MeSH] OR gait[tiab] OR walk\*[tiab] OR "walking"[MeSH] OR walking[tiab] OR ambulation[tiab])

#### **AND**

2) ("Neuromuscular Diseases"[Mesh] OR ("Muscular Dystrophy, Duchenne"[Mesh] OR ("Charcot-Marie-Tooth Disease"[Mesh] OR ("Muscular Atrophy, Spinal"[Mesh] OR ("*Muscular Dystrophies*"[Mesh]) OR ("Muscular Dystrophies, Limb-Girdle"[Mesh] OR "Distal Myopathies"[Mesh] OR "Myopathies, Structural, Congenital"[Mesh] OR ("Myotonic Dystrophy"[Mesh] OR ("Muscular Dystrophy, Facioscapulohumeral"[Mesh] OR ("Glycogen Storage Disease Type II"[Mesh] OR "Glycogen Phosphorylase, Muscle Form"[Mesh] OR "GAA protein, human" [Supplementary Concept] OR "Spastic Paraplegia, Hereditary"[Mesh])

#### **AND**

3) ("Validation Study" [Publication Type] OR "Reproducibility of Results"[Mesh] OR "observer variation"[MeSH] OR reliability[tiab] OR validity[tiab] OR ((generaliza\*[tiab] OR reliab\*[tiab] OR "intraclass correlation"[tiab]) AND coefficient\*[tiab]) OR (item[tiab] AND (correlation\*[tiab] OR selection\*[tiab] OR reduction\*[tiab])) OR agreement[tiab] OR precision[tiab] OR test-retest[tiab] OR (test[tiab] AND retest[tiab]) OR (reliab\*[tiab] AND (test[tiab] OR retest[tiab])) OR ((interrater[tiab] OR inter-rater[tiab] OR intrarater[tiab] OR intrarater[tiab] OR intertester[tiab] OR inter-tester[tiab] OR intratester[tiab] OR intratester[tiab] OR interobserver[tiab] OR inter-observer[tiab] OR intraobserver[tiab] OR intraobserver[tiab] OR interexaminer[tiab] OR inter-examiner[tiab] OR intraexaminer[tiab] OR intraexaminer[tiab] OR inter-individual[tiab] OR intraparticipant[tiab]) AND reliab\*[tiab]) OR repeatab\*[tiab] OR "interscale correlation"[tiab] OR "interscale correlations"[tiab] OR ((error[tiab] OR errors[tiab]) AND (measure\*[tiab] OR correlat\*[tiab] OR evaluat\*[tiab] OR accuracy[tiab] OR accurate[tiab] OR precision[tiab] OR mean[tiab])) OR "individual variability"[tiab] OR "interval variability"[tiab] OR "rate variability"[tiab] OR "variability analysis"[tiab] OR (uncertainty[tiab] AND (measurement[tiab] OR measuring[tiab])) OR "standard error of measurement"[tiab] OR sensitiv\*[tiab] OR sensitivity[tiab] OR responsive\*[tiab] OR responsiveness[tiab] OR "minimal detectable concentration"[tiab] OR "minimal important change"[tiab] OR "minimal important difference"[tiab] OR "minimally important change"[tiab] OR "minimally important difference"[tiab] OR (minimal\*[tiab] AND "detectable change"[tiab]) OR "minimal detectable difference"[tiab] OR "minimally detectable difference"[tiab])
