# Supplementary material for: Walking test outcomes in adults with genetic neuromuscular diseases: a systematic literature review of their measurement properties
Source: PubMed Central journal article supplement — Eur J Phys Rehabil Med. 2024 Feb 1;60(2):257–69. doi: 10.23736/S1973-9087.24.08095-X (PMC11114158; doi:10.23736/s1973-9087.24.08095-x), 2024-02-01
Supplement: Supplementary_Digital_Material2.pdf [file Supplementary_Digital_Material2.pdf]

SUPPLEMENTARY DIGITAL MATERIAL 2

Supplementary Table I.—Criteria to rate each measurement property according to Prinsen *et al.*<sup>38</sup> and Terwee *et al.*<sup>43</sup>

| Measurement property                           | Rating <sup>1</sup> | Criteria                                                                                                                                                                                                                                                                                                                                                                                                                                                                                                                                                                                                                 |
|------------------------------------------------|---------------------|--------------------------------------------------------------------------------------------------------------------------------------------------------------------------------------------------------------------------------------------------------------------------------------------------------------------------------------------------------------------------------------------------------------------------------------------------------------------------------------------------------------------------------------------------------------------------------------------------------------------------|
| Structural validity                            | +                   | CTT: CFA: CFI or TLI or comparable measure >0.95 OR RMSEA <0.08 <sup>2</sup><br>IRT/Rasch: No violation of unidimensionality <sup>3</sup> : CFI or TLI or comparable measure >0.95 OR RMSEA < 0.06 OR SRMR<0.08<br>AND<br>no violation of local independence: residual correlations among the items after controlling for the dominant factor < 0.20 OR Q3's < 0.37<br>AND<br>no violation of monotonicity: adequate looking graphs OR item scalability >0.30<br>AND<br>adequate model fit:<br>IRT: $\chi^2 > 0.01$ Rasch: infit and outfit mean squares $\geq 0.5$ and $\leq 1.5$ OR Z- standardized values > -2 and <2 |
|                                                | ?                   | CTT: Not all information for « + » reported IRT/Rasch: Model fit not reported                                                                                                                                                                                                                                                                                                                                                                                                                                                                                                                                            |
|                                                | -                   | Criteria for « + » not met                                                                                                                                                                                                                                                                                                                                                                                                                                                                                                                                                                                               |
| Internal consistency                           | +                   | At least low evidence <sup>4</sup> for sufficient structural validity <sup>5</sup> AND Cronbach's alpha(s) $\geq 0.70$ for each unidimensional scale or subscale <sup>6</sup>                                                                                                                                                                                                                                                                                                                                                                                                                                            |
|                                                | ?                   | Criteria for “At least low evidence <sup>4</sup> for sufficient structural validity <sup>5</sup> ” not met                                                                                                                                                                                                                                                                                                                                                                                                                                                                                                               |
|                                                | -                   | At least low evidence <sup>4</sup> for sufficient structural validity <sup>5</sup> AND Cronbach's alpha(s) < 0.70 for each unidimensional scale or subscale <sup>6</sup>                                                                                                                                                                                                                                                                                                                                                                                                                                                 |
| Reliability                                    | +                   | ICC or weighted Kappa $\geq 0.70$                                                                                                                                                                                                                                                                                                                                                                                                                                                                                                                                                                                        |
|                                                | ?                   | ICC or weighted Kappa not reported                                                                                                                                                                                                                                                                                                                                                                                                                                                                                                                                                                                       |
|                                                | -                   | ICC or weighted Kappa < 0.70                                                                                                                                                                                                                                                                                                                                                                                                                                                                                                                                                                                             |
| Measurement error                              | +                   | SDC or LoA < MIC <sup>5</sup>                                                                                                                                                                                                                                                                                                                                                                                                                                                                                                                                                                                            |
|                                                | ?                   | MIC not defined                                                                                                                                                                                                                                                                                                                                                                                                                                                                                                                                                                                                          |
|                                                | -                   | SDC or LoA > MIC <sup>5</sup>                                                                                                                                                                                                                                                                                                                                                                                                                                                                                                                                                                                            |
| Hypotheses testing for construct validity      | +                   | The result is in accordance with the hypothesis                                                                                                                                                                                                                                                                                                                                                                                                                                                                                                                                                                          |
|                                                | ?                   | No hypothesis defined (by the review team)                                                                                                                                                                                                                                                                                                                                                                                                                                                                                                                                                                               |
|                                                | -                   | The result is not in accordance with the hypothesis                                                                                                                                                                                                                                                                                                                                                                                                                                                                                                                                                                      |
| Cross-cultural validity/measurement invariance | +                   | No important differences found between group factors (such as age, gender, language) in multiple group factor analysis OR no important DIF for group factors (McFadden's $R^2 < 0.02$ )                                                                                                                                                                                                                                                                                                                                                                                                                                  |
|                                                | ?                   | No multiple group factor analysis OR DIF analysis performed                                                                                                                                                                                                                                                                                                                                                                                                                                                                                                                                                              |
|                                                | -                   | Important differences between group factors OR DIF was found                                                                                                                                                                                                                                                                                                                                                                                                                                                                                                                                                             |
| Criterion validity                             | +                   | Correlation with gold standard $\geq 0.70$ OR AUC $\geq 0.70$                                                                                                                                                                                                                                                                                                                                                                                                                                                                                                                                                            |
|                                                | ?                   | Not all information for « + » reported                                                                                                                                                                                                                                                                                                                                                                                                                                                                                                                                                                                   |
|                                                | -                   | Correlation with gold standard < 0.70 OR AUC < 0.70                                                                                                                                                                                                                                                                                                                                                                                                                                                                                                                                                                      |
| Responsiveness                                 | +                   | The result is in accordance with the hypothesis <sup>7</sup> OR AUC $\geq 0.70$                                                                                                                                                                                                                                                                                                                                                                                                                                                                                                                                          |
|                                                | ?                   | No hypothesis defined                                                                                                                                                                                                                                                                                                                                                                                                                                                                                                                                                                                                    |
|                                                | -                   | The result is not in accordance with the hypothesis <sup>7</sup> OR AUC < 0.70                                                                                                                                                                                                                                                                                                                                                                                                                                                                                                                                           |

AUC, area under the curve ; CFA, confirmatory factor analysis ; CFI, comparative fit index ; CTT, classical test theory ; DIF, differential item functioning ; ICC, intraclass correlation coefficient ; IRT, item response theory ; LoA, limits of agreement ; MIC, minimal important change ; RMSEA, Root Mean Square Error of Approximation ; SEM, Standard Error of Measurement ; SDC, smallest detectable change ; SRMR, Standardized Root Mean Residuals ; TLI, Tucker-Lewis index ; <sup>1</sup> “+” sufficient ; “-” insufficient ; “?” indeterminate ; <sup>2</sup> To rate the quality of the summary score, the factor structures should be equal across studies ; <sup>3</sup> unidimensionality refers to a factor analysis per subscale, while structural validity refers to a factor analysis of a (multidimensional) patient-reported outcome measure ; <sup>4</sup> As defined by grading the evidence according to the GRADE approach ; <sup>5</sup> This evidence may come from different studies ; <sup>6</sup> The criteria ‘Cronbach alpha < 0.95’ was deleted, as this is relevant in the development phase of a PROM and not when evaluating an existing PROM ; <sup>7</sup> The results of all studies should be taken together and it should then be decided if 75% of the results are in accordance with the hypotheses.
