# Supplementary material for: Walking test outcomes in adults with genetic neuromuscular diseases: a systematic literature review of their measurement properties
Source: PubMed Central journal article supplement — Eur J Phys Rehabil Med. 2024 Feb 1;60(2):257–69. doi: 10.23736/S1973-9087.24.08095-X (PMC11114158; doi:10.23736/s1973-9087.24.08095-x), 2024-02-01
Supplement: Supplementary_Digital_Material3.pdf [file Supplementary_Digital_Material3.pdf]

SUPPLEMENTARY DIGITAL MATERIAL 3

Supplementary Table II.—Characteristics of the selected studies.

| Articles                                             | Type of NMD | Study design                                   | Sample size | Age of participants | Healthy group presence (N/No) | Walking capacities test                   | Type of measures assessment                                                              | Walking assessments tools                                 | Physical examination (Yes/No) | Lower limbs physical examination                            | Impairment scale |
|------------------------------------------------------|-------------|------------------------------------------------|-------------|---------------------|-------------------------------|-------------------------------------------|------------------------------------------------------------------------------------------|-----------------------------------------------------------|-------------------------------|-------------------------------------------------------------|------------------|
| <b>Solari <i>et al.</i>, 2007<sup>46</sup></b>       | CMT         | cross-sectional study monocentric              | 40          | 42.4 (12.6)         | No                            | 10MWT                                     | 10MWT time                                                                               | Stop watch                                                | Yes                           | Lower limbs maximal voluntary isometric contraction         | ONLS             |
| <b>Ferrarin <i>et al.</i>, 2011<sup>47</sup></b>     |             | cross-sectional study monocentric              | 20          | 24.6 (17.1)         | No                            | NA                                        | kinematics, EMG and SPT measures                                                         | motion analysis system                                    | Yes                           | NA                                                          | CMTES            |
| <b>Guillebastre <i>et al.</i>, 2013<sup>48</sup></b> |             | prospective monocentric study                  | 26          | 50.7 (16.0)         | 19                            | 12-m distance at a self-selected velocity | SPT measures                                                                             | GAITRite electronic walkway of 8.3m active area           | Yes                           | dorsal and plantar-flexor muscles with MRC                  | NA               |
| <b>Padua <i>et al.</i>, 2016<sup>49</sup></b>        |             | prospective multicenter study                  | 168         | 44.4 (13.7)         | No                            | 6MWT and 10MWT                            | 6MWD                                                                                     | Activity Monitoring Watch                                 | Yes                           | NA                                                          | CMTNS            |
| <b>Lencioni <i>et al.</i>, 2017<sup>50</sup></b>     |             | prospective unicentric study                   | 71          | 31.5 (17.6)         | No                            | NA                                        | kinematics and SPT measures                                                              | motion analysis system                                    | Yes                           | NA                                                          | CMTES            |
| <b>Coghe <i>et al.</i>, 2020<sup>51</sup></b>        |             | cross sectional study                          | 20          | 48.9 (15.5)         | 20                            | 10MWT                                     | SPT and kinematics measures                                                              | motion analysis system                                    | Yes                           | NA                                                          | CMTNS (v2)       |
| <b>Mori <i>et al.</i>, 2018<sup>52</sup></b>         |             | multicentric longitudinal prospective study    | 53          | 52.1 (11.9)         | No                            | 6MWT and 10MWT                            | 6MWD and 10MWT time                                                                      | Stop watch                                                | Yes                           | dorsal and plantar-flexor muscles strength with dynamometer | CMTNS            |
| <b>Pazzaglia <i>et al.</i>, 2019<sup>53</sup></b>    |             | longitudinal and prospective multicenter study | 149         | 42.5 (12.5)         | No                            | 6MWT, 10MWT and monitoring during 5 days  | 6MWD, 10MWT time and several outputs during the five days monitoring (as activity index) | Stop watch and accelerometer (StepWatch Activity Monitor) | Yes                           | NA                                                          | CMTNS (v2)       |
| <b>Hammaren <i>et al.</i>, 2012<sup>59</sup></b>     | DM1         | cross-sectional study monocentric              | 10          | 42.7 (10.7)         | No                            | 10mWT, Fo8, ST and TUG                    | 10MWT and TUG times (and number of steps of ST and Fo8)                                  | Stop watch                                                | No                            | NA                                                          | NA               |
| <b>Galli <i>et al.</i>, 2012<sup>55</sup></b>        |             | cross-sectional study monocentric              | 10          | 1.5 (7.6)           | 20                            | NA                                        | kinematics, EMG and SPT measures                                                         | motion analysis system                                    | Yes                           | MRC lower limbs                                             | NA               |
| <b>Hammaren <i>et al.</i>, 2014<sup>60</sup></b>     |             | cross-sectional study monocentric              | 51          | 41.3 (9.7)          | No                            | 10MWT, TUG and ST                         | 10MWT and TUG times,                                                                     | Stop watch                                                | Yes                           | Lower limb isometric muscle force (with a                   | NA               |

|                                                  |             |                                                   |                                                                              |                              |    |                         |                                                            |                                                  |     |                                                                                                         |               |
|--------------------------------------------------|-------------|---------------------------------------------------|------------------------------------------------------------------------------|------------------------------|----|-------------------------|------------------------------------------------------------|--------------------------------------------------|-----|---------------------------------------------------------------------------------------------------------|---------------|
| <b>Kierkegaard et al., 2017</b> <sup>56</sup>    |             | prospective unicentric study                      | 70                                                                           | 45(13)                       | No | 10mW/RT, 6MWT and TUG   | number of steps of ST<br>6MWD; 10mW/RT and TUG times       | Stop watch                                       | Yes | handheld dynamometer)<br>NA                                                                             | MIRS          |
| <b>Solbakken et al., 2016</b> <sup>61</sup>      |             | cross sectional study                             | 38                                                                           | 39 (12.4)                    | No | 6MWT, TUG               | 6MWD and TUG time                                          | corridor of 20m, stopwatch                       | Yes | MMT of upper, lower limbs and anterior flexors/back extensors trunk                                     | NA            |
| <b>Kierkegaard et al., 2018</b> <sup>62</sup>    |             | cross-sectional study monocentric                 | 11                                                                           | 52 (range 29–85)             | No | TUG                     | TUG time                                                   | Stop watch                                       | Yes | NA                                                                                                      | MIRS          |
| <b>Kierkegaard et al., 2007</b> <sup>54</sup>    |             | cross-sectional study monocentric                 | 12 for test retest reliability (i) part and 64 for the feasibility part (ii) | (i) 44 (12) and (ii) 43 (13) | No | 6MWT                    | 6MWT distance                                              | Stop watch                                       | Yes | NA                                                                                                      | MIRS          |
| <b>Jimenez-Moreno et al., 2019</b> <sup>57</sup> |             | from observational natural history PHENODM1 study | 30                                                                           | 48 (25–72)                   | 14 | 10MWT, 10mW/RT and 6MWT | Mean acceleration units during the 6MWD, 10MWT and 10mW/RT | Accelerometer                                    | Yes | Lower limb isometric muscle force (with a myometer): ankle dorsiflexors, knee extensors and hip flexors | No            |
| <b>Jimenez-Moreno et al., 2019</b> <sup>63</sup> |             | from observational natural history PHENODM1 study | 213                                                                          | 45.2 (14.5)                  | No | 10MWT, 10mW/RT and 6MWT | 6MWD, 10MWT, 10mW/RT times                                 | Stop watch                                       | Yes | QMT                                                                                                     | SARA and MIRS |
| <b>Knak et al., 2020</b> <sup>58</sup>           |             | prospective study and bicentric                   | 78                                                                           | 40 (10)                      | No | 10MWT, TUG              | 10MWT and TUG times                                        | Stop watch                                       | Yes | hip extensor, knee extensor, ankle plantar and dorsal flexor muscles strength with dynamometer          | MIRS          |
| <b>Knak et al., 2020</b> <sup>64</sup>           |             | bicentric longitudinal prospective study          | 63                                                                           | 41 (10)                      | No | 6MWT, 10MWT, TUG and ST | 6MWD, 10MWT and TUG times, number of steps of ST           | Stop watch                                       | Yes | Lower limbs muscle strength with dynamometer                                                            | MIRS          |
| <b>Radovanovic et al., 2016</b> <sup>65</sup>    | DM1 and DM2 | prospective monocentric study                     | 37 (20 DM1 and 17 DM2)                                                       | 38.6 (10.9)                  | 48 | NA                      | SPT measures                                               | GAITRite electronic walkway of 5.5 m active area | Yes | Lower limbs muscle strength with MRC                                                                    | NA            |
| <b>Montagnese et al., 2020</b> <sup>66</sup>     | DM2         | monocentric longitudinal prospective study        | 66                                                                           | 54.8 (12.4)                  | No | 6MWT                    | 6MWD                                                       | Stop watch                                       | Yes | MMT lower limbs                                                                                         | NA            |

|                                             |                      |                                                   |                                                       |                                                      |    |                                                    |                                                   |                                                                                                        |     |                                                                               |          |
|---------------------------------------------|----------------------|---------------------------------------------------|-------------------------------------------------------|------------------------------------------------------|----|----------------------------------------------------|---------------------------------------------------|--------------------------------------------------------------------------------------------------------|-----|-------------------------------------------------------------------------------|----------|
| <b>Iosa et al., 2007</b> <sup>67</sup>      | FSHD                 | cross-sectional study monocentric                 | 12                                                    | 40,4 (10.8)                                          | 12 | NA                                                 | kinematics and SPT measures                       | motion analysis system                                                                                 | Yes | MMT lower limb                                                                | FCS      |
| <b>Aprile et al., 2013</b> <sup>24</sup>    |                      | cross-sectional study monocentric                 | 16                                                    | 46.5 (16.4)                                          | 16 | 10mWT, 2MWT and walking on baropodometric platform | 2MWD, 10MWT time and SPT measures                 | Stop watch and baropodometric platform                                                                 | Yes | MMT with MRC of lower limbs                                                   | CSS      |
| <b>Eichinger et al., 2017</b> <sup>68</sup> |                      | cross sectional study bicentric                   | 86                                                    | 49.1 (15.2)                                          | No | 6MWT, TUG, 30 foot Go and 10MWT                    | 6MWD and TUG, 30 foot Go, 10MWT times             | corridor of 40 m in one center and a corridor of 50m in the other, stopwatch                           | Yes | MMT of upper and lower limbs                                                  | FCS      |
| <b>Huisinga et al., 2018</b> <sup>69</sup>  |                      | prospective cohort unicentric study               | 17                                                    | 53.7 [32-67]                                         | No | TUG                                                | SPT parameters during TUG                         | wearable magneto-inertial sensors                                                                      | Yes | MMT of lower limbs                                                            | FCS      |
| <b>Statland et al., 2019</b> <sup>70</sup>  |                      | prospective cohort study                          | 10                                                    | 54 (8.2)                                             | No | iTUG                                               | SPT parameters during TUG                         | wireless inertial sensors (at each wrist, 1 at the sternum, 1 at the lumbar area, and 1 at each ankle) | Yes | NA                                                                            | FCS      |
| <b>Gidaro et al., 2022</b> <sup>71</sup>    | FSHD and LGMD2       | exploratory endpoint in multicenter phase 1 trial | 10                                                    | aged 18 to 75 years                                  | No | NA                                                 | SPT parameters in real life conditions            | wearable magneto-inertial sensors                                                                      | Yes | MMT of lower limbs                                                            | NA       |
| <b>Martino et al., 2019</b> <sup>72</sup>   | HSP                  | cross sectional study                             | 21                                                    | 48.4 (10.9)                                          | 20 | 15x7 m walkway                                     | kinematics, SPT parameters and EMG measures       | motion analysis system and wireless EMG                                                                | Yes | NA                                                                            | SPRS     |
| <b>Claeys et al., 2022</b> <sup>74</sup>    | LOPD                 | cross sectional study                             | 12                                                    | 51.3 (range 22-67)                                   | 12 | 6MWT, 10MWT and TUG                                | 6MWD, 10MWT and TUG times                         | Stop watch                                                                                             | Yes | MRC sum score and lower limb isometric muscle force (with Biodex dynamometer) | NA       |
| <b>Vanherpe et al., 2020</b> <sup>73</sup>  |                      | retrospective multicentric study                  | 52                                                    | 47.9 (15.2)                                          | No | 6MWT                                               | 6MWD                                              | Stop watch                                                                                             | Yes | MRC sum score                                                                 | NA       |
| <b>Jacques et al., 2018</b> <sup>75</sup>   | Muscular Dystrophies | cross sectional study                             | 24 (only ambulant people out of 60 included with NMD) | BMD: 42.4 (13.5) LGMD: 43.1 (12.4) FSHD: 47.7 (11.1) | 16 | 10MWT                                              | 10MWT time                                        | Stop watch                                                                                             | Yes | Isometric and KEMVC force                                                     | PFMVC NA |
| <b>Prahn et al., 2014</b> <sup>76</sup>     | Several NMD          | cross sectional study monocentric                 | 16                                                    | 47.4 (14.4)                                          | 12 | 6MWT                                               | 6MWD                                              | Stop watch and pulse watch for HR measurement                                                          | Yes | MRC Hip,knee and Anfle (F/E)                                                  | NA       |
| <b>Andersen et al., 2016</b> <sup>45</sup>  |                      | prospective monocentric study                     | 115                                                   | 52.6 (22-83)                                         | 38 | 2MWT and 6MWT                                      | 2MWD and 6MWD and velocity during 2MWT and at 1st | Stop watch                                                                                             | Yes | Lower limbs muscle strength with MRC                                          | NA       |

|                                                    |      |                                                                         |    |              |    |                              |                                        |                                                                                                                        |     |                                                     |       |
|----------------------------------------------------|------|-------------------------------------------------------------------------|----|--------------|----|------------------------------|----------------------------------------|------------------------------------------------------------------------------------------------------------------------|-----|-----------------------------------------------------|-------|
| <b>Knak et al., 2017</b> <sup>77</sup>             |      | monocentric prospective study                                           | 93 | 53 (17)      | No | 2MWT and 6MWT                | and 2MWD and 6MWD                      | Stop watch                                                                                                             | Yes | MRC lower limbs                                     | NA    |
| <b>Takeuchi et al., 2008</b> <sup>79</sup>         | SBMA | cross-sectional study<br>monocentric                                    | 35 | 55.8 (11.2)  | 29 | 6MWT                         | 6MWT distance                          | Stop watch                                                                                                             | Yes | Limb Norris Score                                   | NA    |
| <b>Montes et al., 2010</b> <sup>88</sup>           | SMA  | cross-sectional study<br>monocentric                                    | 9  | 22 [4-49]    | 9  | 6MWT                         | SPT measures and 6MWD                  | Stop watch and GAITRite electronic walkway of 4.6m active area                                                         | No  | NA                                                  | NA    |
| <b>Montes et al., 2014</b> <sup>87</sup>           |      | cross-sectional study<br>monocentric                                    | 10 | 31.2 (9-49)  | No | 6MWT                         | 6MWD                                   | Stop watch                                                                                                             | Yes | Total leg strength measured by MMT                  | NA    |
| <b>Dunaway et al., 2014</b> <sup>86</sup>          |      | monocentric longitudinal prospective study                              | 15 | 28.73 (4.17) | No | 6MWT, TUG, 10 meter walk/run | 6MWD, TUG time, 10 meter walk/run time | Stop watch                                                                                                             | Yes | MMT lower limbs                                     | HFMSE |
| <b>Dunaway et al., 2016</b> <sup>83</sup>          |      | Retrospective study                                                     | 30 | 23.7 (16.4)  | No | 6MWT, TUG, 10 meter walk/run | 6MWD, TUG time, 10 meter walk/run time | GAITRite electronic walkway of 4.25m active area for SPT measures and instrumented footwear (SoleSound) and stop watch | Yes | MMT lower limbs                                     | NA    |
| <b>Rodriguez-Torres et al., 2020</b> <sup>84</sup> |      | sub study from 2 clinical trial studies                                 | 23 | 28.0 (16.5)  | No | 6MWT                         | 6MWD                                   | Stop watch                                                                                                             | Yes | MRC lower limbs                                     | NA    |
| <b>Bartels et al., 2019</b> <sup>82</sup>          |      | Cross sectional monocentric study (Pilot test sample)                   | 4  | 26.2 (10-37) | No | ESWT                         | ESWT time                              | Stop Watch                                                                                                             | No  | NA                                                  | NA    |
| <b>Bartels et al., 2020</b> <sup>81</sup>          |      | monocentric longitudinal prospective study                              | 15 | 28.4 (12.4)  | 25 | ESWT                         | ESWT time                              | Stop Watch                                                                                                             | Yes | Lower limbs MRC                                     | NA    |
| <b>Elsheikh et al., 2020</b> <sup>85</sup>         |      | inside a monocentric double-blind, placebo-controlled, cross-over trial | 33 | 37.2 (9.1)   | No | 6MWT                         | 6MWD                                   | Stop watch                                                                                                             | Yes | Lower limbs maximal voluntary isometric contraction | NA    |
| <b>Stolte et al., 2020</b> <sup>80</sup>           |      | monocentric longitudinal prospective study                              | 51 | 35.8 (12.7)  | No | 6MWT                         | 6MWD                                   | Stop watch                                                                                                             | Yes | NA                                                  | HFMSE |

|                                           |                                |                                            |     |                        |    |                |                                                                                |              |    |    |    |
|-------------------------------------------|--------------------------------|--------------------------------------------|-----|------------------------|----|----------------|--------------------------------------------------------------------------------|--------------|----|----|----|
| <b>Montes et al., 2017</b> <sup>89</sup>  |                                | cross-sectional monocentric study          | 9   | 27.9 (range 11.0–51.8) | No | 6MWT and 10MWT | and (i) initial velocity support (ii) double footwear (SoleSound) and GaitRite | Instrumented | No | NA | NA |
| <b>Montano et al., 2022</b> <sup>78</sup> | Primary mitochondrial myopathy | monocentric longitudinal prospective study | 117 | NA                     | No | 6MWT and TUG   | 6MWD and TUG time                                                              | Stop watch   | No | NA | NA |

ALS-FRS-R: amyotrophic lateral sclerosis functional rating scale; BMD: Becker Muscular Dystrophy; CMT: Charcot Marie Tooth; CMTES: CMT Examination Score; CMTNS: CMT Neuropathy Score ; CSS: Clinical Severity Score; DM1: Dystrophy myotonic type 1; DM2: Dystrophy Myotonic type 2;DMD: Duchenne Muscular Dystrophy; FCS: FSHD Clinical Score; FSHD: facioscapulohumeral muscular dystrophy; F/E: Flexion/Extension; Neuropathy Score; CS: Comfortable speed; EMG: Electromyographic; ESWT: Endurance Shuttle Walk Test; HFMSE: Hammersmith Functional Motor Scale Expanded; HR: Heart Rate; HSP: Hereditary Spastic Paraplegia; KEMVC: Knee Extensor Muscular; Voluntary Contraction; LGMD: Limb Girdle Muscle Dystrophy; LOPD: Late onset Pompe; NA: Non Applicable; NMD: Neuromuscular diseases; MMT: Manual Muscle Testing; MIRS: Muscular Impairment Rating Scale; MRC: Medical Research Council Scale; ONLS: Overall Neuropathy Limitations Scale; PFMVC: Plantar Flexor Muscular Voluntary Contraction; SARA: Scale for the Assessment and Rating of Ataxia; SPT: spatiotemporal; SRPS: Spastic Paraplegia Rating Scale; TUG: Times up and Go test; 2MWD: 2-minute walking distance; 2MWT: 2-minute walking Test; 6MWD: 6- minute walking distance; 6MWT: 6-minute walk test; 10MWT: 10-minute walk test; 10MW/RT: 10-meter walk/run test; ST: step test; Fo8, Walking in a Figure of eight.
