# Supplementary material for: Walking test outcomes in adults with genetic neuromuscular diseases: a systematic literature review of their measurement properties
Source: PubMed Central journal article supplement — Eur J Phys Rehabil Med. 2024 Feb 1;60(2):257–69. doi: 10.23736/S1973-9087.24.08095-X (PMC11114158; doi:10.23736/s1973-9087.24.08095-x), 2024-02-01
Supplement: Supplementary_Digital_Material4.pdf [file Supplementary_Digital_Material4.pdf]

SUPPLEMENTARY DIGITAL MATERIAL 4

Supplementary Table III.—Measurement properties of the included studies in Charcot Marie Tooth disease: validity.

| Articles                                          | Walking test             | Type of variables studied                                                    | Validity         |                                                                                                                   |                                                                                                                                                                                                                                   |           |                                          |                                           |
|---------------------------------------------------|--------------------------|------------------------------------------------------------------------------|------------------|-------------------------------------------------------------------------------------------------------------------|-----------------------------------------------------------------------------------------------------------------------------------------------------------------------------------------------------------------------------------|-----------|------------------------------------------|-------------------------------------------|
|                                                   |                          |                                                                              | Type of validity | Compared to                                                                                                       | Results (95% CI)                                                                                                                                                                                                                  | COSMIN    | Criterion quality and/or criteria rating | Hypotheses testing for construct validity |
| <b>Padua <i>et al.</i>, 2016<sup>49</sup></b>     | 6MWT                     | 6MWD                                                                         | Construct        | (i) 10MWT (ii) CMTNS (iii) plantar flexion as detected by a myometer (iv) dorsi flexion as detected by a myometer | (i) $\rho = -0.54$ (P<0.001) (ii) $\rho = -0.55$ (P<0.001) (iii) $\rho = 0.45$ (P<0.001) (iv) $\rho = 0.49$ (P<0.001)                                                                                                             | Very good | NA                                       | ?                                         |
| <b>Mori <i>et al.</i>, 2018<sup>52</sup></b>      |                          |                                                                              | Construct        | (1) CMTNS (2) dorsal and (3) plantar-flexor muscles strength                                                      | (1) $\rho=0.11$ ; P=0.52 (2) $\rho=0.32$ ; P=0.051 (3) $\rho=0.004$ ; P=0.98 and correlation between 6MWT and 10MWT: $\rho=-0.63$ ; P<0,001                                                                                       | Very good | NA                                       | ?                                         |
| <b>Pazzaglia <i>et al.</i>, 2019<sup>53</sup></b> |                          |                                                                              | NA               | NA                                                                                                                | NA                                                                                                                                                                                                                                | NA        | NA                                       | NA                                        |
| <b>Mori <i>et al.</i>, 2018<sup>52</sup></b>      | 10MWT                    | 10MWT time                                                                   | Construct        | (1) CMTNS (2)dorsal and (3) plantar-flexor muscles strength                                                       | (1) 0.26; P=0.084 (2) $\rho = -0.50$ ; P=0.0017 (3) $\rho=-0.34$ ; P=0.027                                                                                                                                                        | Very good | NA                                       | ?                                         |
| <b>Solari <i>et al.</i>, 2007<sup>46</sup></b>    |                          |                                                                              | NA               | NA                                                                                                                | NA                                                                                                                                                                                                                                | NA        | NA                                       | NA                                        |
| <b>Pazzaglia <i>et al.</i>, 2019<sup>53</sup></b> |                          |                                                                              | NA               | NA                                                                                                                | NA                                                                                                                                                                                                                                | NA        | NA                                       | NA                                        |
| <b>Coghe <i>et al.</i>, 2020<sup>51</sup></b>     |                          | (i) velocity (ii) step width (iii) stride length (iv) DST (v) kinematic data | Construct        | CMTNS2                                                                                                            | (i) $\rho = -0.783$ (P=0.001) (ii) $\rho = -0.248$ (P=0.306) (iii) $\rho=-0.776$ (P<0.001) (iv) $\rho=0.523$ (P=0.022) (v) $\rho$ from -0.004 (p=0.986) for Hip Abduction–adduction to 0.832 (P<0.001) for Knee Flexion–extension | Very good | NA                                       | +                                         |
| <b>Pazzaglia <i>et al.</i>, 2019<sup>52</sup></b> | Monitoring during 5 days | Several outputs during the five days monitoring (as activity index)          | NA               | NA                                                                                                                | NA                                                                                                                                                                                                                                | NA        | NA                                       | NA                                        |
| <b>Padua <i>et al.</i>, 2016<sup>49</sup></b>     | Monitoring during 5 days | Several outputs during the five days monitoring (as activity index)          | Construct        | (i) 10MWT (ii) CMTNS (iii) plantar flexion as detected by a myometer                                              | (i) $\rho$ from -0.08 to 0.10 (P>0.05) (ii) $\rho$ from -0.31 to 0.07 (the most of correlation)                                                                                                                                   | Very good | NA                                       | ?                                         |

|                                                      |                       |                                                                                                                                                                                                                                                                                                                                |           |                                                   |                                                                                                                     |              |                                                                       |                                                                     |    |    |  |
|------------------------------------------------------|-----------------------|--------------------------------------------------------------------------------------------------------------------------------------------------------------------------------------------------------------------------------------------------------------------------------------------------------------------------------|-----------|---------------------------------------------------|---------------------------------------------------------------------------------------------------------------------|--------------|-----------------------------------------------------------------------|---------------------------------------------------------------------|----|----|--|
|                                                      |                       |                                                                                                                                                                                                                                                                                                                                |           |                                                   | (iv) dorsi flexion as detected by a myometer                                                                        | with P>0.05) | (iii) $\rho$ from -0.20 to 0.40 (the most of correlation with P>0.05) | (iv) $\rho$ from -0.23 to 0.35(the most of correlation with P>0.05) |    |    |  |
| <b>Ferrarin <i>et al.</i>, 2011<sup>47</sup></b>     | NA (Motion analysis)  | (i) CS (1) velocity and (2) double support (3) Mean ankle angle TW– mean ankle angle HW (4) cadence (5)stride length normalized to body height (6) kinematics data (7) kinetics data (ii) RS (1) velocity and (2) double support (3) cadence (4) stride length normalized to body height (5) kinematics data (6) kinetics data | NA        | NA                                                | NA                                                                                                                  | NA           | NA                                                                    | NA                                                                  | NA | NA |  |
| <b>Guillebastre <i>et al.</i>, 2013<sup>48</sup></b> | NA (GAITRite of 8.3m) | (1) Velocity (2) double support                                                                                                                                                                                                                                                                                                | Construct | MRC scores (i) dorsal (ii) plantar-flexor muscles | (1) (i) $\rho = 0.49, P<0.05$ (ii) $\rho = 0.50, P<0.05$ (2) (i) $\rho = -0.19, P>0.05$ (ii) $\rho = -0.04, P>0.05$ | Very good    | NA                                                                    | +                                                                   |    |    |  |
| <b>Lencioni <i>et al.</i>, 2017<sup>50</sup></b>     | NA (Motion analysis)  | (1) Velocity normalized to body height (2) stride length normalized to body height (3) kinematics data (4) kinetics data                                                                                                                                                                                                       | NA        | NA                                                | NA                                                                                                                  | NA           | NA                                                                    | NA                                                                  | NA | NA |  |

CMT: Charcot Marie Tooth; CMTNS: Charcot-Marie-Tooth Neuropathy Score; HW: Heel Walking; GC: Gait Cycle; ICC: Intercorrelation coefficient; NA: Non Applicable; RS: rapid speed; RSME: Root-mean-square error; SD: Standard Deviation; SEM: Standard Error Measurement; SL: Stride Length; SRM: Standardised Response Mean; ST: Step Test; SWT: Swing Time; TW: Toe Walking; 6MWD: 6-minute walking distance; 6MWT: 6-minute walk test; 10MWT: 10-minute walk test.

Supplementary Table IV.—Measurement properties of the included studies in Charcot Marie Tooth disease: reliability.

| Articles                                                                                                                                                                        | Walking test             | Type of variables studied                                                                                                                                                                                                                                                                                                      | Reliability                   |                                                                                                                                                                                                                                                                                                                                                                                                                                                                                                                        | COSMIN*   | Quality criteria rating |
|---------------------------------------------------------------------------------------------------------------------------------------------------------------------------------|--------------------------|--------------------------------------------------------------------------------------------------------------------------------------------------------------------------------------------------------------------------------------------------------------------------------------------------------------------------------|-------------------------------|------------------------------------------------------------------------------------------------------------------------------------------------------------------------------------------------------------------------------------------------------------------------------------------------------------------------------------------------------------------------------------------------------------------------------------------------------------------------------------------------------------------------|-----------|-------------------------|
|                                                                                                                                                                                 |                          |                                                                                                                                                                                                                                                                                                                                | Design                        | Results (95% CI)                                                                                                                                                                                                                                                                                                                                                                                                                                                                                                       |           |                         |
| <b>Padua et al., 2016</b> <sup>49</sup><br><b>Mori et al., 2018</b> <sup>52</sup><br><b>Pazzaglia et al., 2019</b> <sup>53</sup>                                                | 6MWT                     | 6MWD                                                                                                                                                                                                                                                                                                                           | Test-retest                   | ICCs >0.9                                                                                                                                                                                                                                                                                                                                                                                                                                                                                                              | adequate  | +                       |
|                                                                                                                                                                                 |                          |                                                                                                                                                                                                                                                                                                                                | NA                            | NA                                                                                                                                                                                                                                                                                                                                                                                                                                                                                                                     | NA        | NA                      |
|                                                                                                                                                                                 |                          |                                                                                                                                                                                                                                                                                                                                | NA                            | NA                                                                                                                                                                                                                                                                                                                                                                                                                                                                                                                     | NA        | NA                      |
| <b>Mori et al., 2018</b> <sup>52</sup><br><b>Solari et al., 2007</b> <sup>46</sup><br><br><b>Pazzaglia et al., 2019</b> <sup>53</sup><br><b>Coghe et al. 2020</b> <sup>51</sup> | 10MWT                    | 10MWT time<br><br><br>(i) velocity (ii) step width (iii) stride length (iv) DST (v) kinematic data                                                                                                                                                                                                                             | NA                            | NA                                                                                                                                                                                                                                                                                                                                                                                                                                                                                                                     | NA        | NA                      |
|                                                                                                                                                                                 |                          |                                                                                                                                                                                                                                                                                                                                | (i)Inter-rater Intra-rater    | (ii) 10MWT (i)ICC=0.97, 95% CI [0.88–0.99]; (ii)ICC=0.96, 95% CI [0.87–0.99]                                                                                                                                                                                                                                                                                                                                                                                                                                           | very good | +                       |
|                                                                                                                                                                                 |                          |                                                                                                                                                                                                                                                                                                                                | NA                            | NA                                                                                                                                                                                                                                                                                                                                                                                                                                                                                                                     | NA        | NA                      |
| <b>Pazzaglia et al., 2019</b> <sup>53</sup>                                                                                                                                     | Monitoring during 5 days | Several outputs during the five days monitoring (as activity index)                                                                                                                                                                                                                                                            | NA                            | NA                                                                                                                                                                                                                                                                                                                                                                                                                                                                                                                     | NA        | NA                      |
| <b>Padua et al., 2016</b> <sup>49</sup>                                                                                                                                         | Monitoring during 5 days | Several outputs during the five days monitoring (as activity index)                                                                                                                                                                                                                                                            |                               | ICCs >0.9                                                                                                                                                                                                                                                                                                                                                                                                                                                                                                              | NA        | NA                      |
| <b>Ferrarin et al., 2011</b> <sup>47</sup>                                                                                                                                      | NA (Motion analysis)     | (i) CS (1) velocity and (2) double support (3) Mean ankle angle TW– mean ankle angle HW (4) cadence (5)stride length normalized to body height (6) kinematics data (7) kinetics data (ii) RS (1) velocity and (2) double support (3) cadence (4) stride length normalized to body height (5) kinematics data (6) kinetics data | Test-retest (4–6 weeks apart) | (i) (1) ICC=0.95, (2)ICC=0.93 (3) ICC = 0.95 (4) ICC=0.91 (5) ICC=0.96 (6) All variables have ICC > 0.7 except Trunk ROM in sagittal plane (ICC=0.22) and in transverse plane (ICC=0.34) (7) All variables have ICC > 0.8 (ii) (1) ICC=0.78 (2) ICC = 0.72 (3) ICC=0.71 (4) ICC = 0.78 (5) All variables have ICC > 0.7 except Trunk ROM in sagittal plane (ICC=0.27) and in frontal plane (ICC=-0.04) and transverse plane (ICC=-0.49)(6) All variables have ICC > 0.8 except hip positive mechanical work (ICC=0.74) | very good | +                       |

|                                                |                       |                                                                                                                          |    |    |    |    |
|------------------------------------------------|-----------------------|--------------------------------------------------------------------------------------------------------------------------|----|----|----|----|
| <b>Guillebastre et al., 2013</b> <sup>48</sup> | NA (GAITRite of 8.3m) | (1) Velocity (2) double support                                                                                          | NA | NA | NA | NA |
| <b>Lencioni et al., 2017</b> <sup>50</sup>     | NA (Motion analysis)  | (1) Velocity normalized to body height (2) stride length normalized to body height (3) kinematics data (4) kinetics data | NA | NA | NA | NA |

CMT: Charcot Marie Tooth; CMTNS: Charcot-Marie-Tooth Neuropathy Score; HW: Heel Walking; GC: Gait Cycle; ICC: Intercorrelation coefficient; NA: Non Applicable; RS: rapid speed; RSME: Root-mean-square error; SD: Standard Deviation; SEM: Standard Error Measurement; SL: Stride Length; SRM: Standardised Response Mean; ST: Step Test; SWT: Swing Time; TW: Toe Walking; 6MWD: 6-minute walking distance; 6MWT: 6-minute walk test; 10MWT: 10-minute walk test.

Supplementary Table V.—Measurement properties of the included studies in Charcot Marie Tooth disease: measurement error, responsiveness, and feasibility.

| Articles                                       | Walking test             | Type of variables studied                                                                                                                                                                                                                                                                                                       | Measurement error                                                                                                                                                                                                                                                       |           |                         | Responsiveness                                                                                      |            |                         | Feasibility |         |
|------------------------------------------------|--------------------------|---------------------------------------------------------------------------------------------------------------------------------------------------------------------------------------------------------------------------------------------------------------------------------------------------------------------------------|-------------------------------------------------------------------------------------------------------------------------------------------------------------------------------------------------------------------------------------------------------------------------|-----------|-------------------------|-----------------------------------------------------------------------------------------------------|------------|-------------------------|-------------|---------|
|                                                |                          |                                                                                                                                                                                                                                                                                                                                 | Results (95% CI)                                                                                                                                                                                                                                                        | COSMIN    | Quality criteria rating | Results (95% CI)                                                                                    | COSMIN     | Quality criteria rating | Outcomes    | Results |
| <b>Padua et al., 2016</b> <sup>49</sup>        | 6MWT                     | 6MWD                                                                                                                                                                                                                                                                                                                            | NA                                                                                                                                                                                                                                                                      | NA        | NA                      | NA                                                                                                  | NA         | NA                      | NA          | NA      |
| <b>Mori et al., 2018</b> <sup>52</sup>         |                          |                                                                                                                                                                                                                                                                                                                                 | NA                                                                                                                                                                                                                                                                      | NA        | NA                      | NA                                                                                                  | NA         | NA                      | NA          | NA      |
| <b>Pazzaglia et al., 2019</b> <sup>53</sup>    |                          |                                                                                                                                                                                                                                                                                                                                 | NA                                                                                                                                                                                                                                                                      | NA        | NA                      | baseline vs. 12 months: 6MWT p=0.71                                                                 | inadequate | ?                       | NA          | NA      |
| <b>Mori et al., 2018</b> <sup>52</sup>         | 10MWT                    | 10MWT time                                                                                                                                                                                                                                                                                                                      | NA                                                                                                                                                                                                                                                                      | NA        | NA                      | NA                                                                                                  | NA         | NA                      | NA          | NA      |
| <b>Solari et al., 2007</b> <sup>46</sup>       |                          |                                                                                                                                                                                                                                                                                                                                 | NA                                                                                                                                                                                                                                                                      | NA        | NA                      | NA                                                                                                  | NA         | NA                      | NA          | NA      |
| <b>Pazzaglia et al., 2019</b> <sup>53</sup>    |                          |                                                                                                                                                                                                                                                                                                                                 | NA                                                                                                                                                                                                                                                                      | NA        | NA                      | baseline vs. 12 months: 10 MWT p=0.21                                                               | inadequate | ?                       | NA          | NA      |
| <b>Coghe et al. 2020</b> <sup>51</sup>         |                          |                                                                                                                                                                                                                                                                                                                                 | (i) velocity (ii) step width (iii) stride length (iv) DST (v) kinematic data                                                                                                                                                                                            | NA        | NA                      | NA                                                                                                  | NA         | NA                      | NA          | NA      |
| <b>Pazzaglia et al., 2019</b> <sup>53</sup>    | Monitoring during 5 days | Several outputs during the five days monitoring (as activity index)                                                                                                                                                                                                                                                             | NA                                                                                                                                                                                                                                                                      | NA        | NA                      | baseline vs. 12 months: several SAM outputs demonstrated worsening (P<0.05) and CMTNS too (P<0.001) | inadequate | ?                       | NA          | NA      |
| <b>Padua et al., 2016</b> <sup>49</sup>        | Monitoring during 5 days | Several outputs during the five days monitoring (as activity index)                                                                                                                                                                                                                                                             | NA                                                                                                                                                                                                                                                                      | NA        | NA                      | NA                                                                                                  | NA         | NA                      | NA          | NA      |
| <b>Ferrarin et al., 2011</b> <sup>47</sup>     | NA (Motion analysis)     | (i) CS (1) velocity and (2) double support (3) Mean ankle angle TW– mean ankle angle HW (4) cadence (5) stride length normalized to body height (6) kinematics data (7) kinetics data (ii) RS (1) velocity and (2) double support (3) cadence (4) stride length normalized to body height (5) kinematics data (6) kinetics data | (i) (1) SEM=3.67m/s (2) SEM=1.11%GC (3) SEM=2.7° (4) SEM=1.99 steps/min (5) ICC=2.16% (6) SEM from 2.31° to 9.36° according to the kinematics variables (ii) (1) SEM = 10.12 m/s (2) SEM = 2.19%GC (3) SEM=5.77 steps/min (4) SEM=6.09% (5) (6) SEM from 2.54° to 6.03° | very good | ?                       | NA                                                                                                  | NA         | NA                      | NA          | NA      |
| <b>Guillebastre et al., 2013</b> <sup>48</sup> | NA (GAITRite of 8.3m)    | (1) Velocity (2) double support                                                                                                                                                                                                                                                                                                 | NA                                                                                                                                                                                                                                                                      | NA        | NA                      | NA                                                                                                  | NA         | NA                      | NA          | NA      |
| <b>Lencioni et al., 2017</b> <sup>50</sup>     | NA (Motion analysis)     | (1) Velocity normalized to body height (2) stride length normalized to body                                                                                                                                                                                                                                                     | NA                                                                                                                                                                                                                                                                      | NA        | NA                      | (1) SRM=-0.55 [%body height/s] for step ascending and -0.43 for step descending (2)                 | very good  | +                       | NA          | NA      |

height (3) kinematics data (4)  
kinetics data

SRM=-0.54 [%body  
height] for step ascending  
and -0.56 for step  
descending (3) from -  
0.56° to -0.25° according  
to variables in CS and  
from -0.53° to -0.25° in  
step descending (4) for  
step descending and  
ascending: from -0.53J to  
0.35J

---

CMT: Charcot Marie Tooth; CMTNS: Charcot-Marie-Tooth Neuropathy Score; HW: Heel Walking; GC: Gait Cycle; ICC: Intercorrelation coefficient; NA: Non Applicable; RS: rapid speed; RSME: Root-mean-square error; SD: Standard Deviation; SEM: Standard Error Measurement; SL: Stride Length; SRM: Standardised Response Mean; ST: Step Test; SWT: Swing Time; TW: Toe Walking; 6MWD: 6-minute walking distance; 6MWT: 6-minute walk test; 10MWT: 10-minute walk test.
