# Supplementary material for: Walking test outcomes in adults with genetic neuromuscular diseases: a systematic literature review of their measurement properties
Source: PubMed Central journal article supplement — Eur J Phys Rehabil Med. 2024 Feb 1;60(2):257–69. doi: 10.23736/S1973-9087.24.08095-X (PMC11114158; doi:10.23736/s1973-9087.24.08095-x), 2024-02-01
Supplement: Supplementary_Digital_Material5.pdf [file Supplementary_Digital_Material5.pdf]

SUPPLEMENTARY DIGITAL MATERIAL 5

Supplementary Table VI.—Measurement properties of the included studies in myotonic dystrophies: validity.

| Articles                                               | Subtype of DM | Walking test      | Type of variables studied               | Validity                                                                               |                                                                                           |                                                                                                             |           |                                          |                                           |
|--------------------------------------------------------|---------------|-------------------|-----------------------------------------|----------------------------------------------------------------------------------------|-------------------------------------------------------------------------------------------|-------------------------------------------------------------------------------------------------------------|-----------|------------------------------------------|-------------------------------------------|
|                                                        |               |                   |                                         | Type of validity                                                                       | Compared to                                                                               | Results (95% CI)                                                                                            | COSMIN    | Criterion quality and/or criteria rating | Hypotheses testing for construct validity |
| <b>Kierkegaard <i>et al.</i>, 2007<sup>54</sup></b>    | DM1           | 6MWT              | 6MWD                                    | NA                                                                                     | NA                                                                                        | NA                                                                                                          | NA        | NA                                       | NA                                        |
| <b>Kierkegaard <i>et al.</i>, 2017<sup>56</sup></b>    |               |                   |                                         | NA                                                                                     | NA                                                                                        | NA                                                                                                          | NA        | NA                                       | NA                                        |
| <b>Solbakken <i>et al.</i>, 2016<sup>61</sup></b>      |               |                   |                                         | Construct                                                                              | (i)MMT of PEmg (iii)Tmg                                                                   | (ii) DEmg (ii) (i) $\rho = 0.45$ , $P=0.005$ (ii) $\rho = 0.62$ , $P<0.001$ (iii) $\rho = 0.67$ , $P<0.001$ | Very good | NA                                       | +                                         |
| <b>Jimenez-Moreno <i>et al.</i>, 2019<sup>57</sup></b> |               |                   |                                         | construct                                                                              | (i) SARA QMT (ii) Hip flexors QMT (iii) ankle dorsiflexors QMT (iv) knee extensors QMT    | (i) $\rho=-0.65$ ; (ii) $\rho=0.51$ ; (iii) $\rho=0.45$ ; (iv) $\rho=0.47$                                  | Very good | NA                                       | +                                         |
| <b>Jimenez-Moreno <i>et al.</i>, 2019<sup>63</sup></b> |               |                   | Mean acceleration units during the 6MWD | NA                                                                                     | NA                                                                                        | NA                                                                                                          | NA        | NA                                       | NA                                        |
| <b>Hammaren <i>et al.</i>, 2012<sup>59</sup></b>       | DM1           | 10mWT (CS and RS) | 10MWT time                              | NA                                                                                     | NA                                                                                        | NA                                                                                                          | NA        | NA                                       |                                           |
| <b>Hammaren <i>et al.</i>, 2014<sup>60</sup></b>       |               |                   |                                         | Construct                                                                              | Total lower limb muscle strength                                                          | $\rho=-0.705$ ; $P<0.001$ (CS) and $\rho=-0.665$ ; $P<0.001$ (RS)                                           | Very good | NA                                       |                                           |
| <b>Kierkegaard <i>et al.</i>, 2017<sup>56</sup></b>    |               |                   | 10MWT (CS)                              | NA                                                                                     | NA                                                                                        | NA                                                                                                          | NA        | NA                                       |                                           |
| <b>Jimenez-Moreno <i>et al.</i>, 2019<sup>57</sup></b> |               |                   | construct                               | (i) SARA QMT (ii) Hip flexors QMT (iii) ankle dorsiflexors QMT (iv) knee extensors QMT | (a) 100% (b) (i) $\rho=0.65$ , (ii) $\rho=-0.45$ , (iii) $\rho=-0.43$ , (iv) $\rho=-0.36$ | Very good                                                                                                   | NA        |                                          |                                           |
| <b>Knak <i>et al.</i>, 2020<sup>64</sup></b>           |               |                   | NA                                      | NA                                                                                     | NA                                                                                        | NA                                                                                                          | NA        | NA                                       |                                           |

|                                                 |     |                                            |              |                                                                                                                                                                                                  |                                                                                                     |                       |    |
|-------------------------------------------------|-----|--------------------------------------------|--------------|--------------------------------------------------------------------------------------------------------------------------------------------------------------------------------------------------|-----------------------------------------------------------------------------------------------------|-----------------------|----|
| <b>Knak et al., 2020<sup>58</sup></b>           |     |                                            | Construct    | Muscle strength (hip extension, knee extension, and ankle plantar and dorsal flexion)                                                                                                            | $\rho = -0.488$ , 95%CI $-0.719$ to $-0.256$ ( $P < 0.0005$ )                                       | Very good             | NA |
| <b>Jimenez-Moreno et al., 2019<sup>63</sup></b> |     | Mean acceleration units during the 10MWT   | NA           | NA                                                                                                                                                                                               | NA                                                                                                  | NA                    | NA |
| <b>Jimenez-Moreno et al., 2019<sup>57</sup></b> | DM1 | 10mW/RT                                    | 10mW/RT time | construct (i) SARA QMT (ii) Hip flexors (iii) ankle dorsiflexors QMT (iv) knee extensors QMT                                                                                                     | (i) $\rho = 0.55$ (ii) $\rho = -0.51$ (iii) $\rho = -0.47$ (iv) $\rho = -0.32$                      | Very good             | NA |
| <b>Jimenez-Moreno et al., 2019<sup>63</sup></b> |     | Mean acceleration units during the 10mW/RT | Construct    | muscle strength of (i) knee extensors and (ii) hip flexors                                                                                                                                       | (i) $\rho = 0.4$ , $P = 0.05$ (ii) $\rho = 0.43$ , $p = 0.02$                                       | (ii) NA               | NA |
| <b>Hammaren et al., 2012<sup>59</sup></b>       | DM1 | TUG                                        | TUG time     | NA                                                                                                                                                                                               | NA                                                                                                  | NA                    | NA |
| <b>Hammaren et al., 2014<sup>60</sup></b>       |     |                                            | Construct    | Total lower limb muscle strength                                                                                                                                                                 | $\rho = -0.585$ ; $P < 0.001$                                                                       | Very good             | NA |
| <b>Kierkegaard et al., 2017<sup>56</sup></b>    |     |                                            | NA           | NA                                                                                                                                                                                               | NA                                                                                                  | NA                    | NA |
| <b>Solbakken et al., 2016<sup>61</sup></b>      |     |                                            | Construct    | (i) MMT of dorsal extension wrist, dorsal extension ankle, MMT of Hip flexion, knee flexion, knee extension, shoulder abduction, elbow flexion, elbow extension, (iii) MMT of trunk muscle group | (i) $\rho = -0.43$ , $P < 0.001$ (ii) $\rho = -0.3$ , $P = 0.08$ (iii) $\rho = -0.58$ , $P < 0.001$ | (ii) $\rho$ Very good | NA |
| <b>Knak et al., 2020<sup>64</sup></b>           |     |                                            | NA           | NA                                                                                                                                                                                               | NA                                                                                                  | NA                    | NA |
| <b>Knak et al., 2020<sup>58</sup></b>           |     |                                            | Construct    | Muscle strength (hip extension, knee                                                                                                                                                             | $\rho = -0.313$ , 95%CI $-0.687$ to $-0.286$ ( $P < 0.0005$ )                                       | Very good             | NA |

|                                               |                    |                      |                                    |           |                                                    |                                                                                                                                                                                                                                                      |           |    |    |
|-----------------------------------------------|--------------------|----------------------|------------------------------------|-----------|----------------------------------------------------|------------------------------------------------------------------------------------------------------------------------------------------------------------------------------------------------------------------------------------------------------|-----------|----|----|
|                                               |                    |                      |                                    |           |                                                    | extension, and ankle dorsal flexion)                                                                                                                                                                                                                 |           |    |    |
| <b>Kierkegaard et al., 2018</b> <sup>62</sup> |                    |                      |                                    |           | NA                                                 | NA                                                                                                                                                                                                                                                   | NA        | NA | NA |
| <b>Hammaren et al., 2012</b> <sup>59</sup>    | DM1                | (i)Fo8 and (ii)ST    | Fo8 time and number of steps of ST | NA        | NA                                                 | NA                                                                                                                                                                                                                                                   | NA        | NA | NA |
| <b>Hammaren et al., 2014</b> <sup>60</sup>    | DM1                | ST                   | number of steps of ST              | Construct | Total lower limb muscle strength                   | $\rho=0.610$ ; $P<0.001$                                                                                                                                                                                                                             | Very good | NA |    |
| <b>Knak et al., 2020</b> <sup>58</sup>        |                    |                      |                                    | Construct | Muscle strength (ankle plantar and dorsal flexion) | $\rho=0.546$ , $P<0.0005$ 95%IC[0.327–0.764]                                                                                                                                                                                                         | Very good | NA |    |
| <b>Knak et al., 2020</b> <sup>64</sup>        |                    |                      |                                    | NA        | NA                                                 | NA                                                                                                                                                                                                                                                   | NA        | NA | NA |
| <b>Galli et al., 2012</b> <sup>55</sup>       | DM1                | velocity (CS)        | NA                                 | Construct | lower limb muscle strength (MRC rectus femoris)    | $\rho=0.62$ , $P<0.05$                                                                                                                                                                                                                               | Very good | NA |    |
| <b>Radovanovic et al., 2016</b> <sup>65</sup> | (i)DM1 and (ii)DM2 | NA (Motion analysis) | CT, SL, SWT                        | Construct | MRC scores                                         | (i)with CT during basic walk ( $\rho = -0.658$ ), with CT during dual task ( $\rho = -0.579$ ) and SL in all gait conditions ( $\rho$ from 0.625 to 0.726) (ii) with SL during basic walk ( $\rho = 0.692$ ), SL during dual task ( $\rho = 0.627$ ) | Very good | NA |    |
| <b>Montagnese et al., 2020</b> <sup>66</sup>  | DM2                | 6MWT                 | 6MWD                               | Construct | lower limb MMT sum                                 | $\rho=0.492$ $P<0.001$                                                                                                                                                                                                                               | Very good | NA |    |

CMT: Charcot Marie Tooth; CMTNS: Charcot-Marie-Tooth Neuropathy Score; HW: Heel Walking; GC: Gait Cycle; ICC: Intercorrelation coefficient; NA: Non Applicable; RS: rapid speed; RSME: Root-mean-square error; SD: Standard Deviation; SEM: Standard Error Measurement; SL: Stride Length; SRM: Standardised Response Mean; ST: Step Test; SWT, Swing Time; TW: Toe Walking; 6MWD: 6-minute walking distance; 6MWT: 6-minute walk test; 10MWT: 10-minute walk test.

Supplementary Table VII.—Measurement properties of the included studies in myotonic dystrophies: reliability.

| Articles                                               | Subtype of DM | Walking test      | Type of variables studied                | Reliability                                 |                                       |                                      |                         |
|--------------------------------------------------------|---------------|-------------------|------------------------------------------|---------------------------------------------|---------------------------------------|--------------------------------------|-------------------------|
|                                                        |               |                   |                                          | Design                                      | Results (95% CI)                      | COSMIN                               | Quality criteria rating |
| <b>Kierkegaard <i>et al.</i>, 2007<sup>54</sup></b>    | DM1           | 6MWT              | 6MWD                                     | Test-retest (one week apart)                | ICC=0,99 (95%CI 0,97-1,0)             | very good                            | +                       |
| <b>Kierkegaard <i>et al.</i>, 2017<sup>56</sup></b>    |               |                   |                                          | Intra-rater (Best trial– average of trials) | ICC=1,00 (0,99-1,00)                  | very good                            | +                       |
| <b>Solbakken <i>et al.</i>, 2016<sup>61</sup></b>      |               |                   |                                          | NA                                          | NA                                    | NA                                   | NA                      |
| <b>Jimenez-Moreno <i>et al.</i>, 2019<sup>57</sup></b> |               |                   |                                          | NA                                          | NA                                    | NA                                   | NA                      |
| <b>Jimenez-Moreno <i>et al.</i>, 2019<sup>63</sup></b> |               |                   | Mean acceleration units during the 6MWD  | intra-accelerometer reliability             | ICC= 0,97 (95% CI 0,95–0,99; P<0,001) | very good                            | +                       |
| <b>Hammaren <i>et al.</i>, 2012<sup>59</sup></b>       | DM1           | 10mWT (CS and RS) | 10MWT time                               | Test-retest (1 week)                        | ICC=0,91(CS)<br>ICC=0,94(RS)          | very good                            | +                       |
| <b>Hammaren <i>et al.</i>, 2014<sup>60</sup></b>       |               |                   |                                          | NA                                          | NA                                    | NA                                   | NA                      |
| <b>Kierkegaard <i>et al.</i>, 2017<sup>56</sup></b>    |               | 10MWT (CS)        |                                          | Intra-rater (Best trial– average of trials) | ICC=0,99 (0,92-1,00)                  | very good                            | +                       |
| <b>Jimenez-Moreno <i>et al.</i>, 2019<sup>57</sup></b> |               |                   | Intra-rater (3 measures)                 | ICC = 0,99, 95% CI [0,99–0,99]              | very good                             | +                                    |                         |
| <b>Knak <i>et al.</i>, 2020<sup>64</sup></b>           |               |                   | NA                                       | NA                                          | NA                                    | NA                                   |                         |
| <b>Knak <i>et al.</i>, 2020<sup>58</sup></b>           |               |                   | Intrarater reliability                   | ICC= 0,96 (0,94–0,98)                       | very good                             |                                      |                         |
| <b>Jimenez-Moreno <i>et al.</i>, 2019<sup>63</sup></b> |               |                   | Mean acceleration units during the 10MWT | intra-accelerometer reliability             | ICC=0,86 (95% CI 0,74–0,93; p=0,003)  | very good                            | +                       |
| <b>Jimenez-Moreno <i>et al.</i>, 2019<sup>57</sup></b> | DM1           | 10mW/RT           | 10mW/RT time                             | Intra-rater (3 measures)                    | ICC=0,99 (0,98–0,99)                  | adequate                             | +                       |
| <b>Jimenez-Moreno <i>et al.</i>, 2019<sup>63</sup></b> |               |                   |                                          | Mean acceleration units during the 10mW/RT  | intra-accelerometer reliability       | ICC=0,96 (95% CI 0,93–0,98; P<0,001) | very good               |
| <b>Hammaren <i>et al.</i>, 2012<sup>59</sup></b>       | DM1           | TUG               | TUG time                                 | Test-retest (1 week)                        | ICC=0,83                              | very good                            | +                       |
| <b>Hammaren <i>et al.</i>, 2014<sup>60</sup></b>       |               |                   |                                          | NA                                          | NA                                    | NA                                   | NA                      |
| <b>Kierkegaard <i>et al.</i>, 2017<sup>56</sup></b>    |               |                   |                                          | Intra-rater (Best trial– average of trials) | TUG=0,98 (0,92-0,99)                  | very good                            | +                       |

|                                               |                    |                      |                                    |                                       |                           |           |    |
|-----------------------------------------------|--------------------|----------------------|------------------------------------|---------------------------------------|---------------------------|-----------|----|
| <b>Solbakken et al., 2016</b> <sup>61</sup>   |                    |                      |                                    | NA                                    | NA                        | NA        | NA |
| <b>Knak et al., 2020</b> <sup>64</sup>        |                    |                      |                                    | NA                                    | NA                        | NA        | NA |
| <b>Knak et al., 2020</b> <sup>58</sup>        |                    |                      |                                    | Intrarater reliability (1 to 2 weeks) | ICC= 0.68 (0.54–0.79)     | very good | -  |
| <b>Kierkegaard et al., 2018</b> <sup>62</sup> |                    |                      |                                    | NA                                    | NA                        | NA        | NA |
| <b>Hammaren et al., 2012</b> <sup>59</sup>    | DM1                | (i)Fo8 and (ii)ST    | Fo8 time and number of steps of ST | Test-retest (1 week)                  | (i)ICC=0.96, (ii)ICC=0.94 | very good | +  |
| <b>Hammaren et al., 2014</b> <sup>60</sup>    | DM1                | ST                   | number of steps of ST              | NA                                    | NA                        | NA        | NA |
| <b>Knak et al., 2020</b> <sup>58</sup>        |                    |                      |                                    | Intrarater reliability (1 to 2 weeks) | 0.90 IC95% [0.82–0.94]    | very good | +  |
| <b>Knak et al., 2020</b> <sup>64</sup>        |                    |                      |                                    | NA                                    | NA                        | NA        | NA |
| <b>Galli et al., 2012</b> <sup>55</sup>       | DM1                | velocity (CS)        | NA                                 | NA                                    | NA                        | NA        | NA |
| <b>Radovanovic et al., 2016</b> <sup>65</sup> | (i)DM1 and (ii)DM2 | NA (Motion analysis) | CT, SL, SWT                        | NA                                    | NA                        | NA        | NA |
| <b>Montagnese et al., 2020</b> <sup>66</sup>  | DM2                | 6MWT                 | 6MWD                               | NA                                    | NA                        | NA        | NA |

CMT: Charcot Marie Tooth; CMTNS: Charcot-Marie-Tooth Neuropathy Score; HW: Heel Walking; GC: Gait Cycle; ICC: Intercorrelation coefficient; NA: Non Applicable; RS: rapid speed; RSME: Root-mean-square error; SD: Standard Deviation; SEM: Standard Error Measurement; SL: Stride Length; SRM: Standardised Response Mean; ST: Step Test; SWT, Swing Time; TW: Toe Walking; 6MWD: 6-minute walking distance; 6MWT: 6-minute walk test; 10MWT: 10-minute walk test.

Supplementary Table VIII.—Measurement properties of the included studies in myotonic dystrophies: measurement error.

| Articles                                               | Subtype of DM | Walking test      | Type of variables studied                  | Measurement error                                                                         |           |                         |
|--------------------------------------------------------|---------------|-------------------|--------------------------------------------|-------------------------------------------------------------------------------------------|-----------|-------------------------|
|                                                        |               |                   |                                            | Results (95% CI)                                                                          | COSMIN    | Quality criteria rating |
| <b>Kierkegaard <i>et al.</i>, 2007<sup>54</sup></b>    | DM1           | 6MWT              | 6MWD                                       | SEM= 12m (Better of 2 6MWTs);<br>SEM=11m (Better of 3 6MWTs);<br>SEM=9m (Mean of 3 6MWTs) | very good | ?                       |
| <b>Kierkegaard <i>et al.</i>, 2017<sup>56</sup></b>    |               |                   |                                            | NA                                                                                        | NA        | NA                      |
| <b>Solbakken <i>et al.</i>, 2016<sup>61</sup></b>      |               |                   |                                            | NA                                                                                        | NA        | NA                      |
| <b>Jimenez-Moreno <i>et al.</i>, 2019<sup>57</sup></b> |               |                   |                                            | NA                                                                                        | NA        | NA                      |
| <b>Jimenez-Moreno <i>et al.</i>, 2019<sup>63</sup></b> |               |                   | Mean acceleration units during the 6MWD    | NA                                                                                        | NA        | NA                      |
| <b>Hammaren <i>et al.</i>, 2012<sup>59</sup></b>       | DM1           | 10mWT (CS and RS) | 10MWT time                                 | (i) SEM=0.6s and ME=1.3(CS)<br>SEM=0.4s and ME=0.7(RS)                                    | very good | ?                       |
| <b>Hammaren <i>et al.</i>, 2014<sup>60</sup></b>       |               |                   |                                            | NA                                                                                        | NA        | NA                      |
| <b>Kierkegaard <i>et al.</i>, 2017<sup>56</sup></b>    |               | 10MWT (CS)        |                                            | NA                                                                                        | NA        | NA                      |
| <b>Jimenez-Moreno <i>et al.</i>, 2019<sup>57</sup></b> |               |                   |                                            | NA                                                                                        | NA        | NA                      |
| <b>Knak <i>et al.</i>, 2020<sup>64</sup></b>           |               |                   |                                            | NA                                                                                        | NA        | NA                      |
| <b>Knak <i>et al.</i>, 2020<sup>58</sup></b>           |               |                   |                                            | SEM=0.26s                                                                                 | very good | ?                       |
| <b>Jimenez-Moreno <i>et al.</i>, 2019<sup>63</sup></b> |               |                   | Mean acceleration units during the 10MWT   | NA                                                                                        | NA        | NA                      |
| <b>Jimenez-Moreno <i>et al.</i>, 2019<sup>57</sup></b> | DM1           | 10mW/RT           | 10mW/RT time                               | NA                                                                                        | NA        | NA                      |
| <b>Jimenez-Moreno <i>et al.</i>, 2019<sup>63</sup></b> |               |                   | Mean acceleration units during the 10mW/RT | NA                                                                                        | NA        | NA                      |
| <b>Hammaren <i>et al.</i>, 2012<sup>59</sup></b>       | DM1           | TUG               | TUG time                                   | SEM=0.7s and ME=1.4                                                                       | very good | ?                       |
| <b>Hammaren <i>et al.</i>, 2014<sup>60</sup></b>       |               |                   |                                            | NA                                                                                        | NA        | NA                      |

|                                               |                    |                      |                                    |                                                             |                     |           |    |
|-----------------------------------------------|--------------------|----------------------|------------------------------------|-------------------------------------------------------------|---------------------|-----------|----|
| <b>Kierkegaard et al., 2017</b> <sup>56</sup> |                    |                      |                                    |                                                             | NA                  | NA        | NA |
| <b>Solbakken et al., 2016</b> <sup>61</sup>   |                    |                      |                                    |                                                             | NA                  | NA        | NA |
| <b>Knak et al., 2020</b> <sup>64</sup>        |                    |                      |                                    |                                                             | NA                  | NA        | NA |
| <b>Knak et al., 2020</b> <sup>58</sup>        |                    |                      |                                    |                                                             | SEM=1.09s           | very good | ?  |
| <b>Kierkegaard et al., 2018</b> <sup>62</sup> |                    |                      |                                    |                                                             | NA                  | NA        | NA |
| <b>Hammaren et al., 2012</b> <sup>59</sup>    | DM1                | (i)Fo8 and (ii)ST    | Fo8 time and number of steps of ST | (i)SEM=1.7steps and ME=14.4<br>(ii)SEM=1.5 steps and ME=2.9 |                     | very good | ?  |
| <b>Hammaren et al., 2014</b> <sup>60</sup>    | DM1                | ST                   | number of steps of ST              |                                                             | NA                  | NA        | NA |
| <b>Knak et al., 2020</b> <sup>58</sup>        |                    |                      |                                    |                                                             | SEM=1.7steps ((±9%) | very good | ?  |
| <b>Knak et al., 2020</b> <sup>64</sup>        |                    |                      |                                    |                                                             | NA                  | NA        | NA |
| <b>Galli et al., 2012</b> <sup>55</sup>       | DM1                | velocity (CS)        | NA                                 |                                                             | NA                  | NA        | NA |
| <b>Radovanovic et al., 2016</b> <sup>65</sup> | (i)DM1 and (ii)DM2 | NA (Motion analysis) | CT, SL, SWT                        |                                                             | NA                  | NA        | NA |
| <b>Montagnese et al., 2020</b> <sup>66</sup>  | DM2                | 6MWT                 | 6MWD                               |                                                             | NA                  | NA        | NA |

CMT: Charcot Marie Tooth; CMTNS: Charcot-Marie-Tooth Neuropathy Score; HW: Heel Walking; GC: Gait Cycle; ICC: Intercorrelation coefficient; NA: Non Applicable; RS: rapid speed; RSME: Root-mean-square error; SD: Standard Deviation; SEM: Standard Error Measurement; SL: Stride Length; SRM: Standardised Response Mean; ST: Step Test; SWT, Swing Time; TW: Toe Walking; 6MWD: 6-minute walking distance; 6MWT: 6-minute walk test; 10MWT: 10-minute walk test.

Supplementary Table IX.—Measurement properties of the included studies in myotonic dystrophies: responsiveness and feasibility.

| Articles                                               | Subtype of DM | Walking test      | Type of variables studied | Responsiveness                                                                                                         |            |                         | Feasibility                                                                                                                     |                                                                                                                                          |
|--------------------------------------------------------|---------------|-------------------|---------------------------|------------------------------------------------------------------------------------------------------------------------|------------|-------------------------|---------------------------------------------------------------------------------------------------------------------------------|------------------------------------------------------------------------------------------------------------------------------------------|
|                                                        |               |                   |                           | Results (95% CI)                                                                                                       | COSMIN     | Quality criteria rating | Outcomes                                                                                                                        | Results                                                                                                                                  |
| <b>Kierkegaard <i>et al.</i>, 2007<sup>54</sup></b>    | DM1           | 6MWT              | 6MWD                      | NA                                                                                                                     | NA         | NA                      | (i) to be able to perform (i) 52/64 participants (ii) 13 (6–two 6MWTs on the same day (1 hour apart) (ii) Median Borg RPE-score | 19)                                                                                                                                      |
| <b>Kierkegaard <i>et al.</i>, 2017<sup>56</sup></b>    |               |                   |                           | NA                                                                                                                     | NA         | NA                      |                                                                                                                                 |                                                                                                                                          |
| <b>Solbakken <i>et al.</i>, 2016<sup>61</sup></b>      |               |                   |                           | NA                                                                                                                     | NA         | NA                      | NA                                                                                                                              | NA                                                                                                                                       |
| <b>Jimenez-Moreno <i>et al.</i>, 2019<sup>57</sup></b> |               |                   |                           | baseline vs. one year visit (1) 1.3s [2.2–0.3] p= 0.009 (2) 0.9s [1.5–0.2] p=0.01 and (3) -36.2 [-19.3– -53.1) P<0.001 | inadequate | ?                       | % of participants made 1 trial of 6MWT, 10mWT, 10mW/RT and 30 seconds sit and stand test                                        | 100% performed one trial, 80% performed at least a second trial of each test and over 50% completed three trials in those tests required |
| <b>Jimenez-Moreno <i>et al.</i>, 2019<sup>63</sup></b> |               |                   |                           | Mean acceleration units during the 6MWD                                                                                | NA         | NA                      | NA                                                                                                                              | NA                                                                                                                                       |
| <b>Hammaren <i>et al.</i>, 2012<sup>59</sup></b>       | DM1           | 10mWT (CS and RS) | 10MWT time                | NA                                                                                                                     | NA         | NA                      | NA                                                                                                                              | NA                                                                                                                                       |
| <b>Hammaren <i>et al.</i>, 2014<sup>60</sup></b>       |               |                   |                           | NA                                                                                                                     | NA         | NA                      | NA                                                                                                                              | NA                                                                                                                                       |
| <b>Kierkegaard <i>et al.</i>, 2017<sup>56</sup></b>    |               |                   |                           | NA                                                                                                                     | NA         | NA                      | NA                                                                                                                              | NA                                                                                                                                       |
| <b>Jimenez-Moreno <i>et al.</i>, 2019<sup>57</sup></b> |               |                   |                           | baseline vs. one year visit: 1.3s [2.2–0.3] p= 0.009                                                                   | inadequate | ?                       | % of participants made 1 trial of 6MWT, 10mWT, 10mW/RT and 30 seconds sit and stand test                                        | 100% performed one trial, 80% performed at least a second trial of each test and over 50% completed three trials in those tests required |
| <b>Knak <i>et al.</i>, 2020<sup>64</sup></b>           |               |                   |                           | change between baseline and 1 year: -0.009 (-0.15; 0.13) p=0.90; AUC between GRS and 10MWT: AUC >0.7                   | very good  | +                       | NA                                                                                                                              | NA                                                                                                                                       |
| <b>Knak <i>et al.</i>, 2020<sup>58</sup></b>           |               |                   |                           | MCID = 0.69 (13%) with MDD95% = ±0.72 (±12%) [±12%]                                                                    | very good  | ?                       | NA                                                                                                                              | NA                                                                                                                                       |



|                                                        |     |                   |                                            |                                                                                         |            |    |                                                                                          |                                                                                                                                          |
|--------------------------------------------------------|-----|-------------------|--------------------------------------------|-----------------------------------------------------------------------------------------|------------|----|------------------------------------------------------------------------------------------|------------------------------------------------------------------------------------------------------------------------------------------|
| <b>Jimenez-Moreno <i>et al.</i>, 2019<sup>63</sup></b> |     |                   | Mean acceleration units during the 10mWT   | NA                                                                                      | NA         | NA | NA                                                                                       | NA                                                                                                                                       |
| <b>Jimenez-Moreno <i>et al.</i>, 2019<sup>57</sup></b> | DM1 | 10mW/RT           | 10mW/RT time                               | 0.9s [1.5–0.2] p=0.01                                                                   | inadequate | ?  | % of participants made 1 trial of 6MWT, 10mWT, 10mW/RT and 30 seconds sit and stand test | 100% performed one trial, 80% performed at least a second trial of each test and over 50% completed three trials in those tests required |
| <b>Jimenez-Moreno <i>et al.</i>, 2019<sup>63</sup></b> |     |                   | Mean acceleration units during the 10mW/RT | NA                                                                                      | NA         | NA | NA                                                                                       | NA                                                                                                                                       |
| <b>Hammaren <i>et al.</i>, 2012<sup>59</sup></b>       | DM1 | TUG               | TUG time                                   | NA                                                                                      | NA         | NA | NA                                                                                       | NA                                                                                                                                       |
| <b>Hammaren <i>et al.</i>, 2014<sup>60</sup></b>       |     |                   |                                            | NA                                                                                      | NA         | NA | NA                                                                                       | NA                                                                                                                                       |
| <b>Kierkegaard <i>et al.</i>, 2017<sup>56</sup></b>    |     |                   |                                            | NA                                                                                      | NA         | NA | NA                                                                                       | NA                                                                                                                                       |
| <b>Solbakken <i>et al.</i>, 2016<sup>61</sup></b>      |     |                   |                                            | NA                                                                                      | NA         | NA | NA                                                                                       | NA                                                                                                                                       |
| <b>Knak <i>et al.</i>, 2020<sup>64</sup></b>           |     |                   |                                            | change between baseline and 1 year: 0.35 (0.17; 0.53) p=0,0003; AUC between 0.6 and 0.7 | very good  | -  | NA                                                                                       | NA                                                                                                                                       |
| <b>Knak <i>et al.</i>, 2020<sup>58</sup></b>           |     |                   |                                            | MCID = 0.92 (11%) with MDD95% = ±1.26 (±26%) [±19%]                                     | NA         | NA | NA                                                                                       | NA                                                                                                                                       |
| <b>Kierkegaard <i>et al.</i>, 2018<sup>62</sup></b>    |     |                   |                                            | Criterion approach AUC walking = 0.8; 95CI% [0.7–0.9]                                   | very good  | +  | NA                                                                                       | NA                                                                                                                                       |
| <b>Hammaren <i>et al.</i>, 2012<sup>59</sup></b>       | DM1 | (i)Fo8 and (ii)ST | Fo8 time and number of steps of ST         | NA                                                                                      | NA         | NA | NA                                                                                       | NA                                                                                                                                       |
| <b>Hammaren <i>et al.</i>, 2014<sup>60</sup></b>       | DM1 | ST                | number of steps of ST                      | NA                                                                                      | NA         | NA | NA                                                                                       | NA                                                                                                                                       |
| <b>Knak <i>et al.</i>, 2020<sup>58</sup></b>           |     |                   |                                            | MCID = 2.87 (16%) with MDD95% = ±4.70 (±26%) [±19%]                                     | very good  | ?  | NA                                                                                       | NA                                                                                                                                       |
| <b>Knak <i>et al.</i>, 2020<sup>64</sup></b>           |     |                   |                                            | change between baseline and 1 year: -0.06 (-0.75;                                       | very good  | -  | NA                                                                                       | NA                                                                                                                                       |

|                                               |                    |                      |             |                                                                           |    |    |    |    |
|-----------------------------------------------|--------------------|----------------------|-------------|---------------------------------------------------------------------------|----|----|----|----|
|                                               |                    |                      |             | 0.63) p=0.88; AUC between GRS and ST: AUC<0.7                             |    |    |    |    |
| <b>Galli et al., 2012</b> <sup>55</sup>       | DM1                | velocity (CS)        | NA          | NA                                                                        | NA | NA | NA | NA |
| <b>Radovanovic et al., 2016</b> <sup>65</sup> | (i)DM1 and (ii)DM2 | NA (Motion analysis) | CT, SL, SWT | NA                                                                        | NA | NA | NA | NA |
| <b>Montagnese et al., 2020</b> <sup>66</sup>  | DM2                | 6MWT                 | 6MWD        | decrease of 34,16 m inadequate (p=0.003) between visit 1 and 2 (one year) | ?  |    | NA | NA |

CMT: Charcot Marie Tooth; CMTNS: Charcot-Marie-Tooth Neuropathy Score; HW: Heel Walking; GC: Gait Cycle; ICC: Intercorrelation coefficient; NA: Non Applicable; RS: rapid speed; RSME: Root-mean-square error; SD: Standard Deviation; SEM: Standard Error Measurement; SL: Stride Length; SRM: Standardised Response Mean; ST: Step Test; SWT: Swing Time; TW: Toe Walking; 6MWD: 6-minute walking distance; 6MWT: 6-minute walk test; 10MWT: 10-minute walk test.
